# Supplementary material for: Culture-centered approaches: the relevance of assessing emotional health for Latinos with type 2 diabetes
Source: HighWire-hosted journal article supplement (doi:10.1136/bmjdrc-2014-000064), 2015-09-01

Supplemental Figure 1. Reported mental health service use by Latinos adults with diabetes, mood disorders, and co-occurring conditions (n=153).

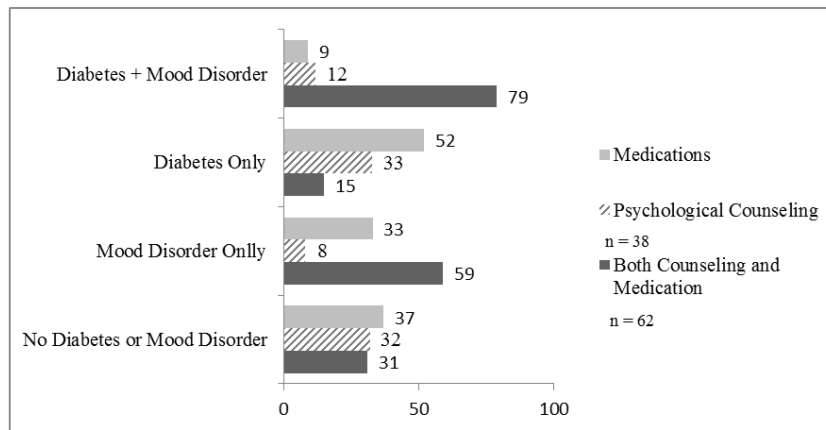

Supplement: bmjdrc-2014-000064supp.pdf [file bmjdrc-2014-000064supp.pdf]
